# Supplementary material for: Micro-optical lens array for fluorescence detection in droplet-based microfluidics
Source: Royal Society of Chemistry journal article supplement (doi:10.1039/c3lc41329b), 2013-01-01
Supplement: c3lc41329b.pdf [file c3lc41329b.pdf]

# Lab on a Chip

## Supplementary Information

### Micro-optical lens array for fluorescence detection in droplet-based microfluidics

Jiseok Lim, Philipp Gruner, Manfred Konrad and Jean-Christophe Baret

**Supplementary Figure 1:** Photograph and microscopic image at the microoptical region of interest for the Two different types of droplet-based microfluidic chips we designed and fabricated: a device composed of a 10 cm delay line structure (a) and a 25 parallel channel structure for re-injection (b).

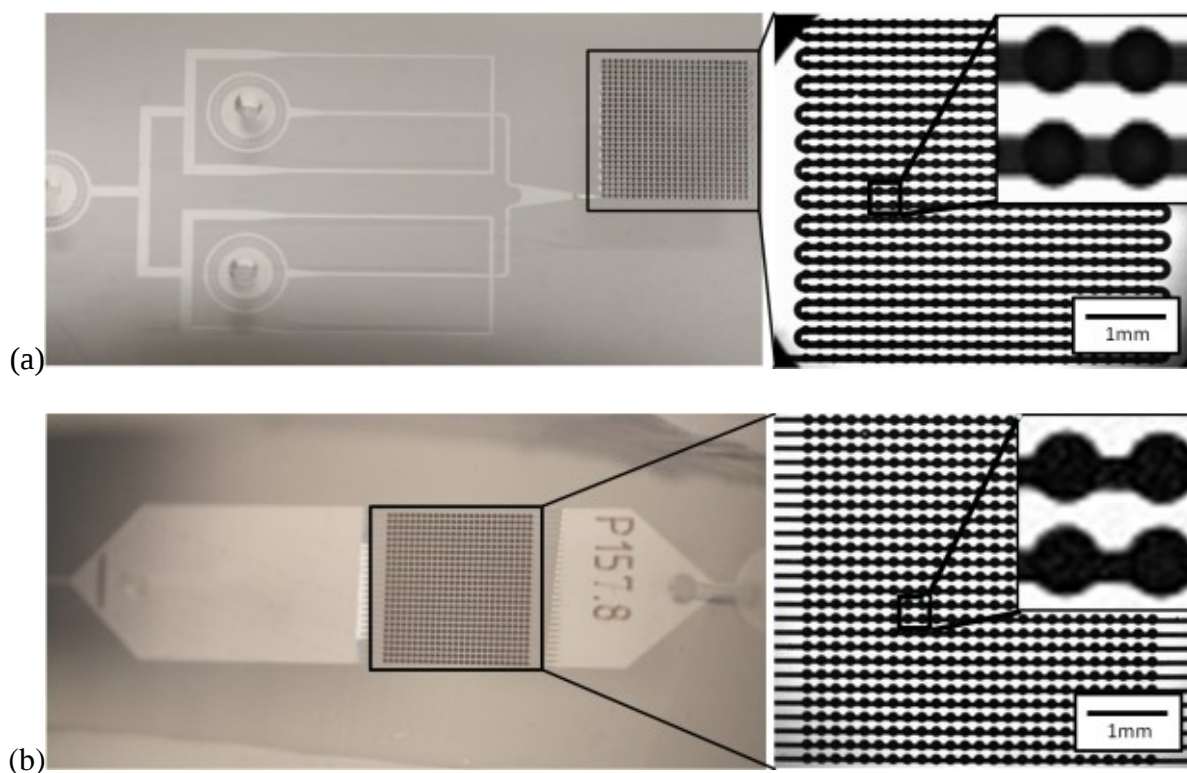

**Supplementary Figure 2:** Imaging through the microscope eyepiece with two different fluorescent dyes (100 mM of resorufin and 100 mM of fluorescein – see supplementary movie 033). Droplets flow from right to left. The droplets containing resorufin can only be detected in the presence of microlenses. See also **Supplementary movie 03**.

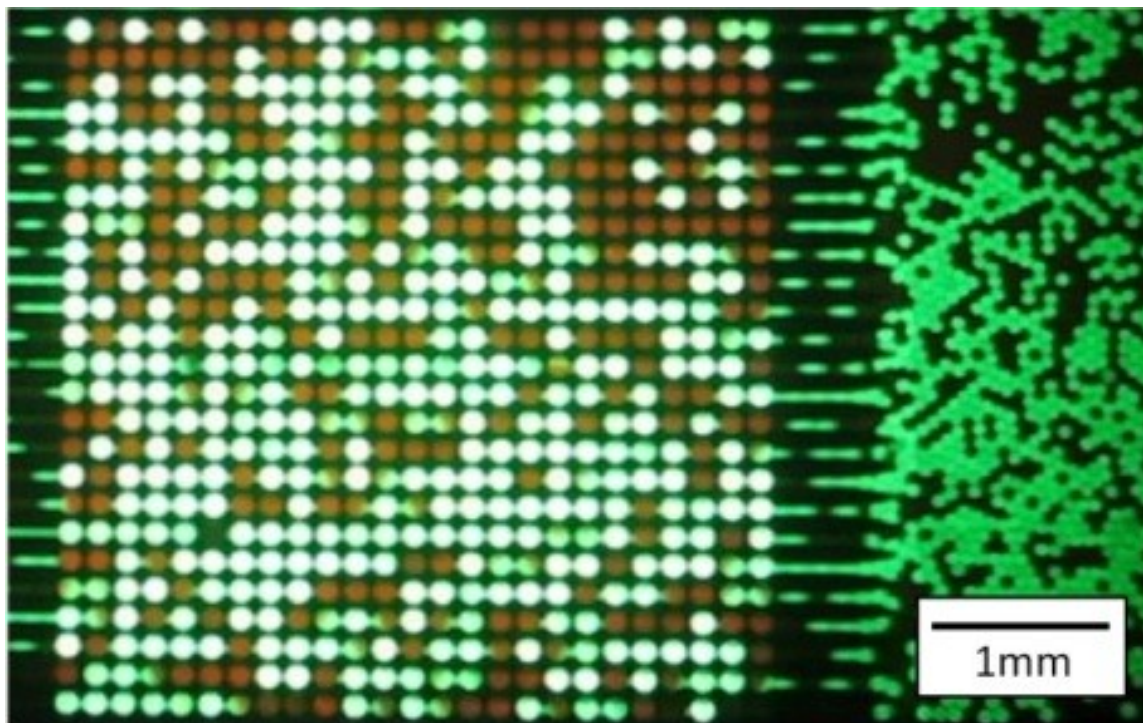

**Supplementary Movies:**

**Supplementary movie 01:**

movie of droplet flowing under the lense array recorded by a high speed camera without backlight illumination.

**Supplementary movie 02:**

movie recorded under similar conditions as movie 01 with backlight illumination.

**Supplementary movie 03:**

movie captured using a standard camera through the eyepiece of the microscope at a frame rate of 23 fps.
